# Supplementary material
Source: Springer Nature journal article supplement (https://www.springermedizin.de/resource/supplementary/12885_2009_1836_MOESM3_ESM.PDF/9460674)

Fig S2 Unsupervised hierarchical clustering of data from FF- and FFPE-derived RNA.

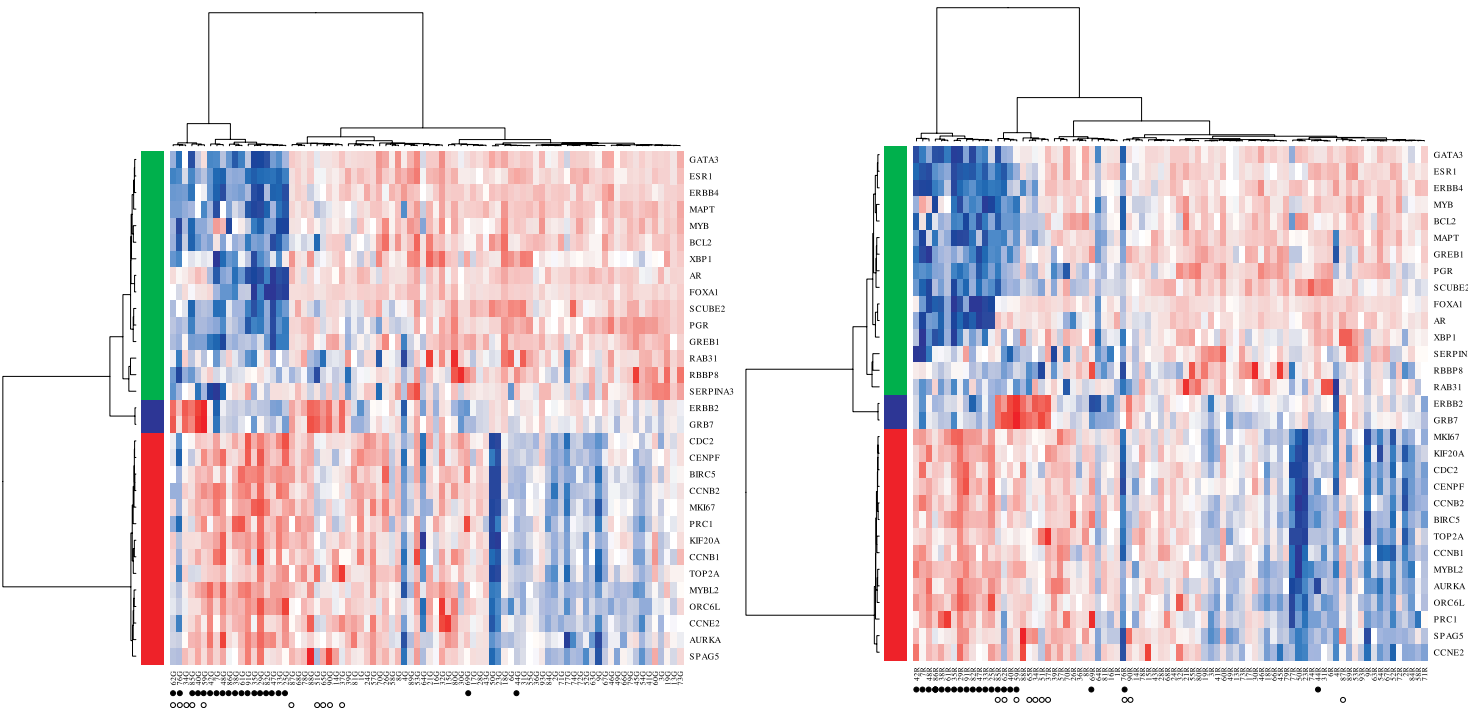

Supplement: MOESM3 [file 9460674]
